# Supplementary material for: Integrated analysis of the Wnt responsive proteome in human cells reveals diverse and cell-type specific networks
Source: Royal Society of Chemistry journal article supplement (doi:10.1039/c3mb70417c), 2013-10-31
Supplement: c3mb70417c.pdf [file c3mb70417c.pdf]

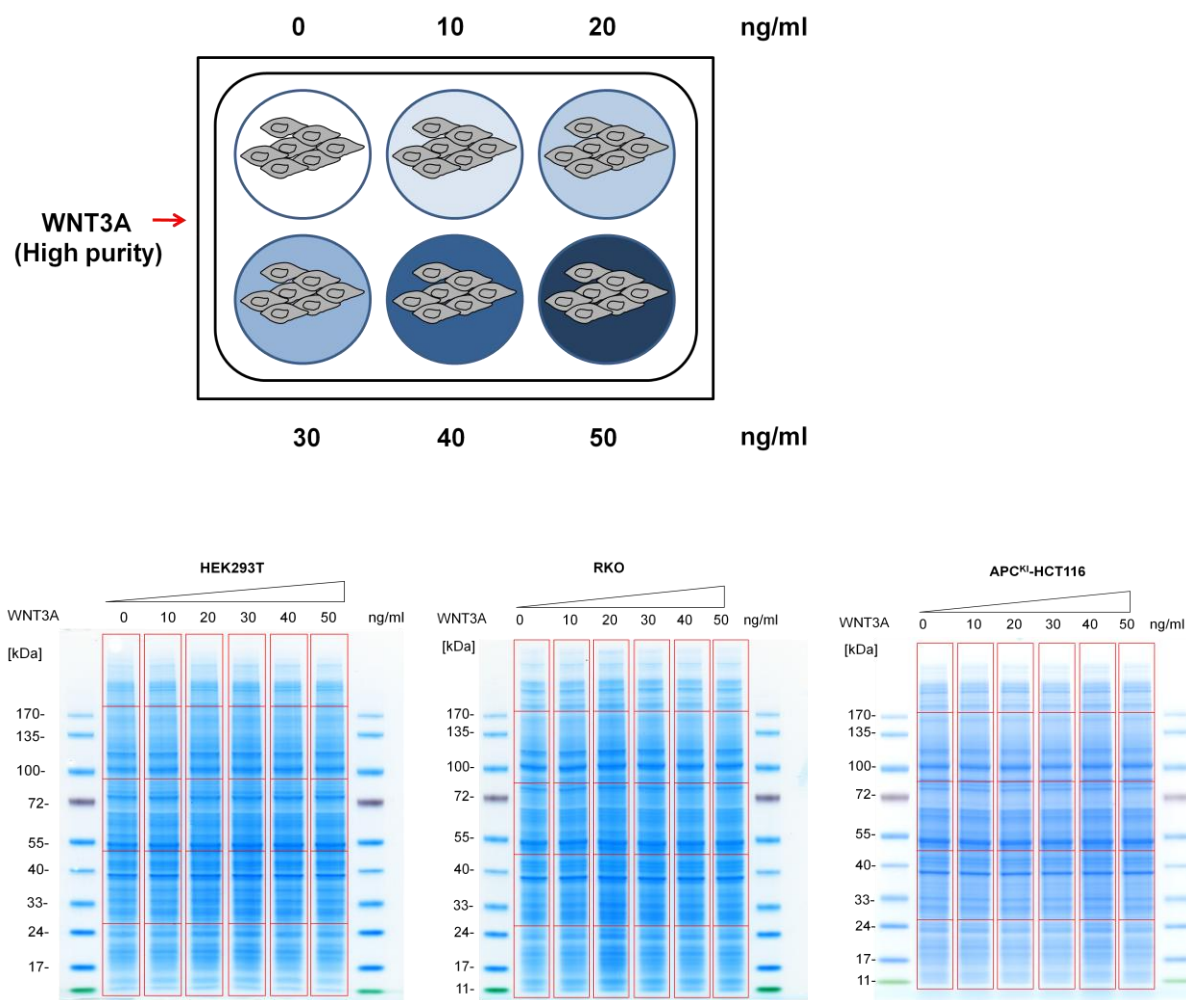

**Supplementary Figure 1** Experimental design and SDS-PAGE 1D protein fractionation

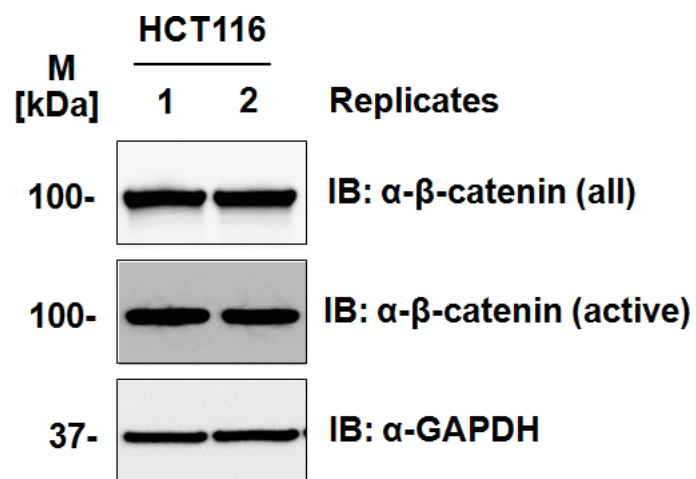

**Supplementary Figure 2.** HCT116 whole cell-lysates subjected to SDS-PAGE followed by immunoblotting with anti- $\beta$ -catenin antisera or anti-active- $\beta$ -catenin. M refers to standard protein marker.
